# Supplementary material for: SBMLsqueezer: A CellDesigner plug-in to generate kinetic rate equations for biochemical networks
Source: Springer Nature journal article supplement (doi:10.1186/1752-0509-2-39), 2008-04-30
Supplement: 12918_2007_196_MOESM4_ESM.pdf [file 12918_2007_196_MOESM4_ESM.pdf]

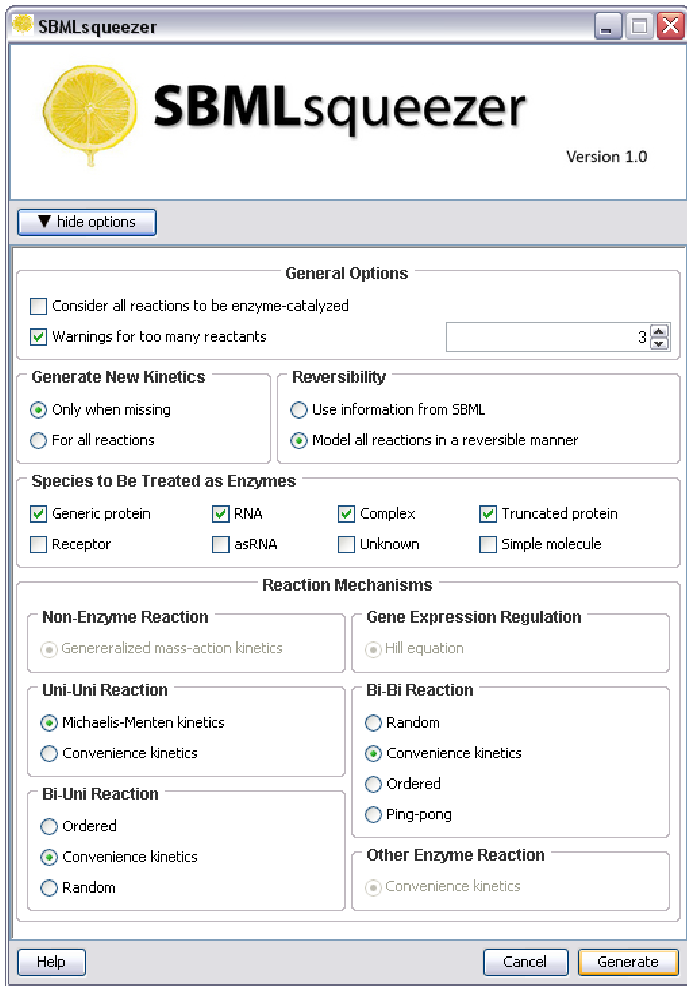

1 ←

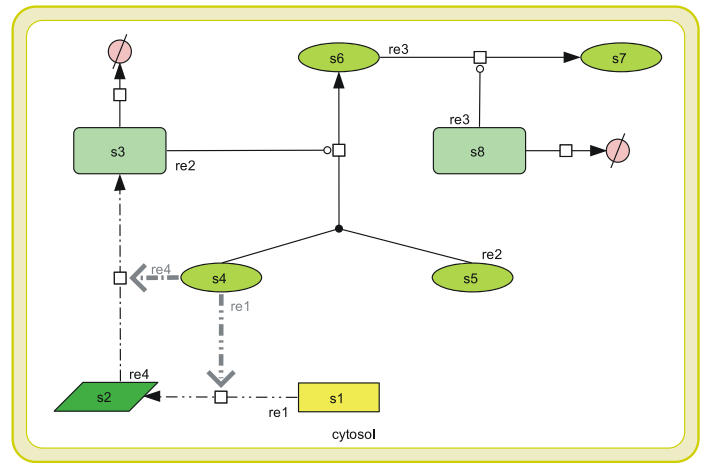

2 →

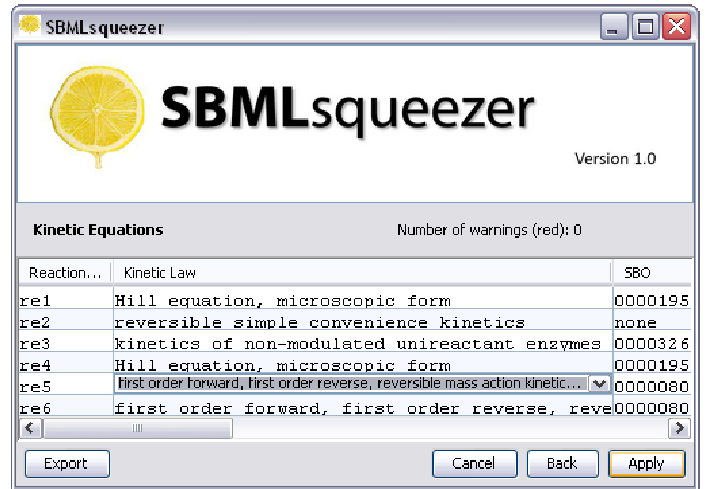

3 ↓

# 1 Rate Laws

## 1.1 Reaction: $r_{e1}$ , Hill equation, microscopic form

$$v_1 = k_1^g \cdot \frac{[S_4]^{n+1, s_4}}{[S_4]^{n+1, s_4} + (k_{+1, s_4}^S)^{n+1, s_4}} \quad (1)$$

## 1.2 Reaction: $r_{e2}$ , reversible simple convenience kinetics

$$v_2 = [S_3] \cdot \frac{k_{+2}^{\text{cat}} \cdot \frac{[S_4]}{k_{2, s_4}^M} \cdot \frac{[S_5]}{k_{2, s_5}^M} - k_{-2}^{\text{cat}} \cdot \frac{[S_6]}{k_{2, s_6}^M}}{\left(1 + \frac{[S_4]}{k_{2, s_4}^M}\right) \left(1 + \frac{[S_5]}{k_{2, s_5}^M}\right) + \frac{[S_6]}{k_{2, s_6}^M}} \quad (2)$$

## 1.3 Reaction: $r_{e3}$ , kinetics of non-modulated unireactant enzymes

$$v_3 = [S_8] \cdot \frac{\frac{k_{+3}^{\text{cat}}}{k_{3, s_6}^m} \cdot [S_6] - \frac{k_{-3}^{\text{cat}}}{k_{3, s_7}^m} \cdot [S_7]}{1 + \frac{[S_6]}{k_{3, s_6}^m} + \frac{[S_7]}{k_{3, s_7}^m}} \quad (3)$$

⋮
