# Supplementary material for: SBMLsqueezer: A CellDesigner plug-in to generate kinetic rate equations for biochemical networks
Source: Springer Nature journal article supplement (doi:10.1186/1752-0509-2-39), 2008-04-30
Supplement: 12918_2007_196_MOESM5_ESM.pdf [file 12918_2007_196_MOESM5_ESM.pdf]

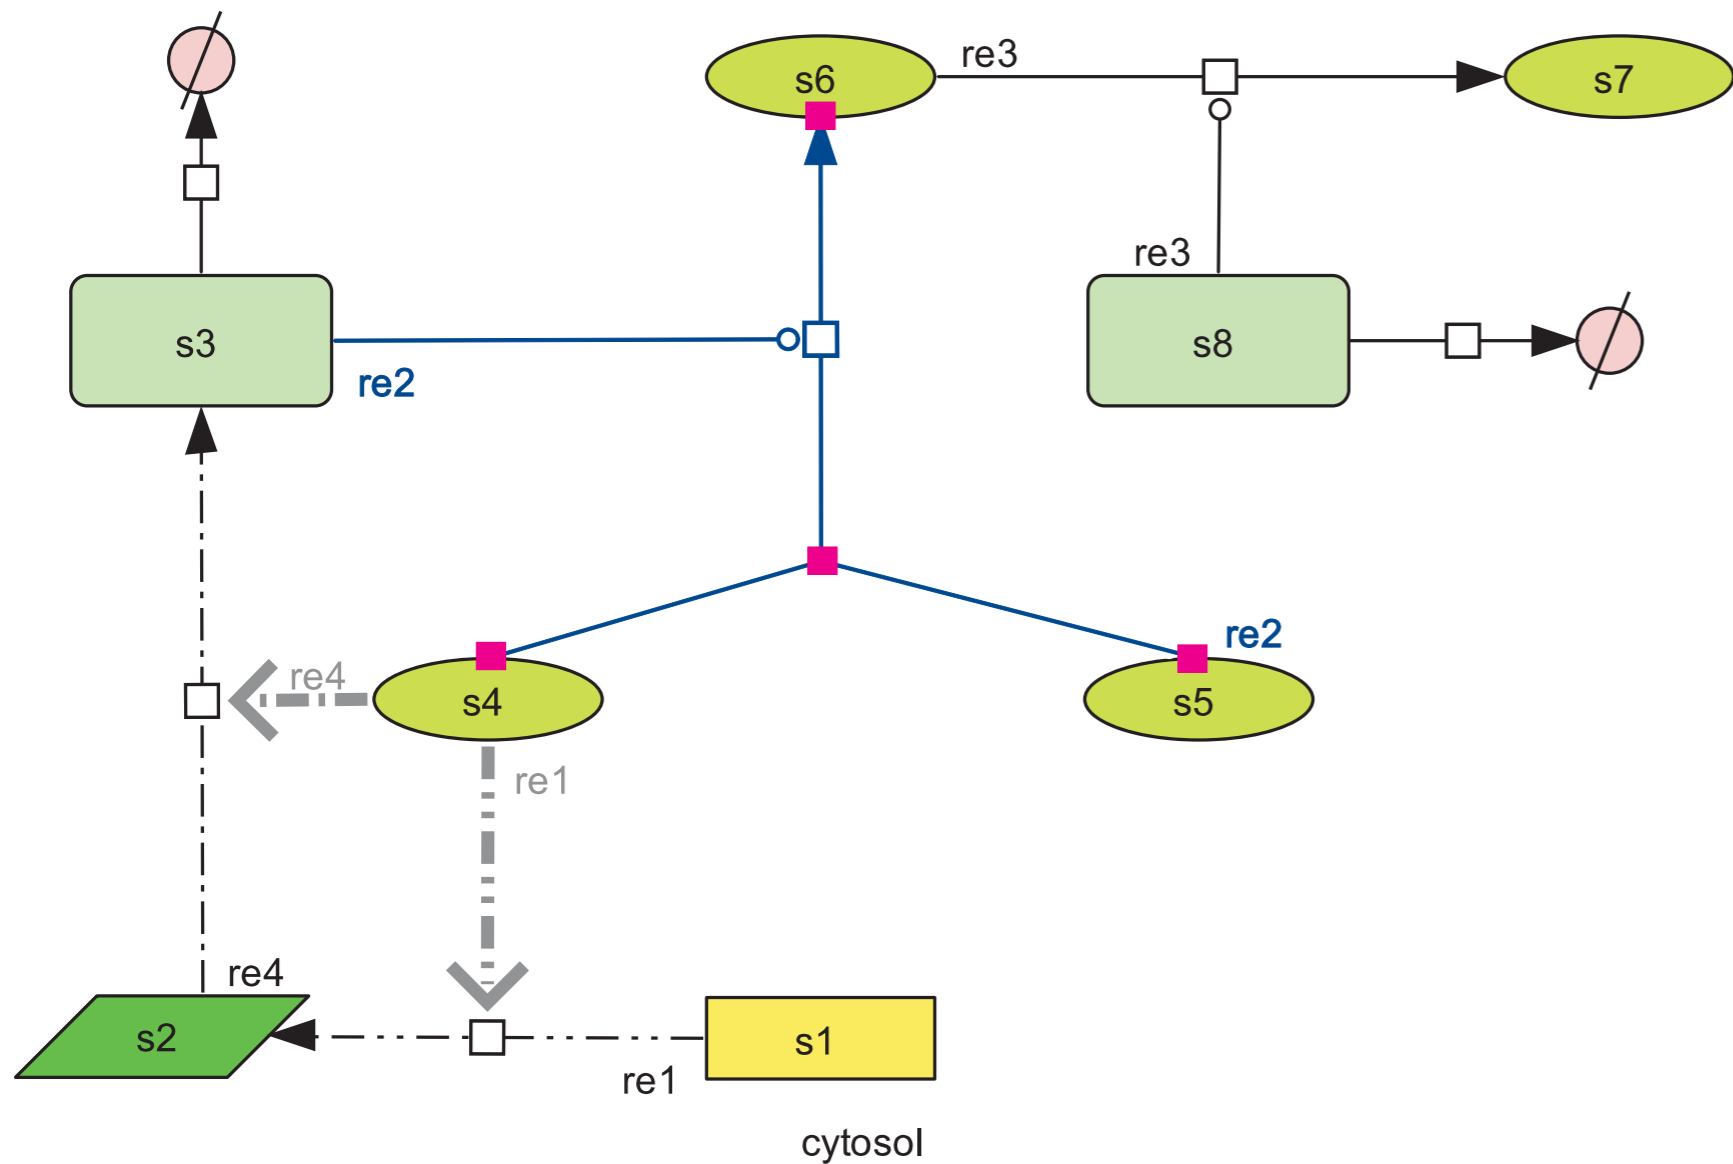

### SBMLsqueezer

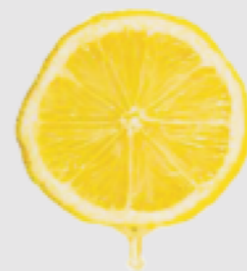

Please choose one kinetic law

- Generalized mass-action
- Convenience kinetics
- Random order mechanism
- Ordered mechanism
- Zeroth order forward mass action kinetics
- Zeroth order reverse mass action kinetics

Equation Preview

$$v_{re2} = [s_3] \cdot \frac{k_{+2}^{cat} \cdot \frac{[s_4]}{M} \cdot \frac{[s_5]}{M} - k_{-2}^{cat} \cdot \frac{[s_6]}{M}}{\left(1 + \frac{[s_4]}{M} + \frac{[s_5]}{M} + \frac{[s_6]}{M}\right) \left(1 + \frac{[s_5]}{M} + \frac{[s_6]}{M}\right) + \frac{[s_6]}{M}}$$

reversible

irreversible

OK

Cancel
